# Supplementary material for: Gallotannin-Enriched Fraction from Quercus infectoria Galls as an Antioxidant and Inhibitory Agent against Human Glioblastoma Multiforme
Source: MDPI journal article supplement (doi:10.3390/plants10122581), 2021-11-25
Supplement: s1 [file s1]

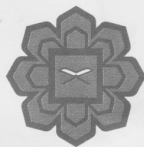

الجامعة الإسلامية العالمية ماليزيا  
INTERNATIONAL ISLAMIC UNIVERSITY MALAYSIA  
يُنشِئُ سِتْقِي إِسْلَامًا رَافِعًا بِغَسِّاءِ مَلِكِيَّةٍ

(Company No. 101067-P)

## KULLIYAH OF PHARMACY

Reference: IIUM/308/15/2/1/NMPC19-1/16

Date: 10<sup>th</sup> October 2019

Norhazilah Muhamad  
Pusat Pengajian Sains Kesihatan  
Universiti Sains Malaysia  
Kampus Kesihatan  
16150 Kubang Kerian  
Kelantan

Dear Sr.,

Assalamualaikum Wrt.

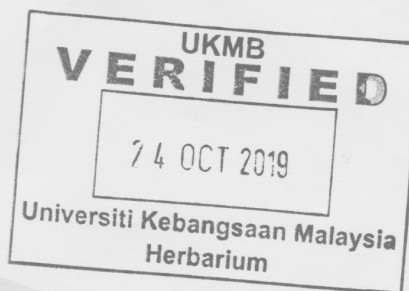

### PLANT SPECIES IDENTIFICATION

Kindly be informed that the plant specimen submitted for identification is confirmed as follows:

| Voucher No.  | Family Name | Scientific Name                                                                          | Local Name           |
|--------------|-------------|------------------------------------------------------------------------------------------|----------------------|
| PIIUM 0229-2 | Fagaceae    | <i>Quercus infectoria</i> G.Olivier.<br>(The tree species from which the gall is formed) | Manjakani (The gall) |

Student's name : Norhazilah Muhamad  
Supervisor's name : Dr. Tan Suat Cheng  
Herbarium : Kulliyyah of Pharmacy  
Person in-charged : Asst. Prof. Dr. Norazian Mohd Hassan  
Identified by : Dr. Shamsul Khamis

It should be noted that we are not involved with anything as a result of research conducted by the host.

Thank you and wassalam.

Sincerely,

  
**ASST. PROF. DR. NORAZIAN BINTI MOHD HASSAN**  
Kulliyyah of Pharmacy  
International Islamic University Malaysia  
Jalan Sultan Ahmad Shah  
Bandar Indera Mahkota  
25200 Kuantan  
Pahang

  
**DR. SHAMSUL KHAMIS**  
Botanist  
Herbarium UKMB  
Faculty of Science and Technology  
The National University of Malaysia (UKM)  
43600 Bangi, Selangor

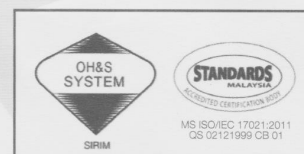

CERTIFIED TO ISO 9001:2008  
CERT. NO. : AR 3074

*Garden of Knowledge and Virtue*

OFFICE ADDRESS: Kulliyyah of Pharmacy, IIUM Kuantan Campus, Jalan Sultan Ahmad Shah, Bandar Indera Mahkota, 25200 Kuantan, Pahang Darul Makmur

Tel: +609 571 6400 / +609 570 4818 / 4820 / 4821 Fax: +609 571 6775 Website: [www.iium.edu.my/pharmacy](http://www.iium.edu.my/pharmacy)

**Voucher specimen no.: PIUM 0229-2**

| No. | Type of information and details                                                                                                                                                                                                                                                                                                                                                                                                                                                                                                    |
|-----|------------------------------------------------------------------------------------------------------------------------------------------------------------------------------------------------------------------------------------------------------------------------------------------------------------------------------------------------------------------------------------------------------------------------------------------------------------------------------------------------------------------------------------|
| 1.  | Family name of the specimen<br><b>Fagaceae [1]</b>                                                                                                                                                                                                                                                                                                                                                                                                                                                                                 |
| 2.  | Scientific name of the specimen, (including the authority – if any)<br><b><i>Quercus infectoria</i> G.Olivier [1]</b>                                                                                                                                                                                                                                                                                                                                                                                                              |
| 3.  | Local name<br><b>Manjakani (English common name/s: Oak galls, Magic nuts) [2,3]</b>                                                                                                                                                                                                                                                                                                                                                                                                                                                |
| 4.  | Collector's name/s (with e-mail address if any)<br><b>Norhazilah Muhamad (norhazilah@yahoo.com)</b>                                                                                                                                                                                                                                                                                                                                                                                                                                |
| 5.  | Student's name, matric no. & Institution<br><b>Norhazilah Muhamad, P-SKD0001/16(R) &amp; PPSK, USM Kelantan</b>                                                                                                                                                                                                                                                                                                                                                                                                                    |
| 6.  | Supervisor's name (with title)<br><b>Dr Tan Suat Cheng</b>                                                                                                                                                                                                                                                                                                                                                                                                                                                                         |
| 7.  | Date of collection<br><b>24 July 2019</b>                                                                                                                                                                                                                                                                                                                                                                                                                                                                                          |
| 8.  | Plant part/s<br><b>Gall (UP)[VS-3]</b>                                                                                                                                                                                                                                                                                                                                                                                                                                                                                             |
| 9.  | Locality where the plant was collected, (including latitude and longitude – if any)<br><b>Purchased from Kedai Ubat Heng De, Kota Bharu, Kelantan</b>                                                                                                                                                                                                                                                                                                                                                                              |
| 10. | Name of the person who determined the identification<br><b>Dr. Shamsul Khamis</b>                                                                                                                                                                                                                                                                                                                                                                                                                                                  |
| 11. | Altitude<br><b>From sea level to c.1,700 m. [4]</b>                                                                                                                                                                                                                                                                                                                                                                                                                                                                                |
| 12. | Habitat or type of plant community<br><b>Mixed scrub and deciduous woodland. Also found co-existing with other species of Oak in vegetation known as longos forests with abundant marsh areas dominated by arboreal Oak species. [4]</b>                                                                                                                                                                                                                                                                                           |
| 13. | Habit<br><b>The galls formed on the young twigs of <i>Q. infectoria</i> tree, as a result of the deposition of the eggs of the gall-wasp <i>Adleriagallae-tinctoriae</i>. [3]</b>                                                                                                                                                                                                                                                                                                                                                  |
| 14. | Any other details about the plant that may be important<br>[Example: flower colour, soil type, slope, aspect, plant height and width, associated species, bark colour and type, sap (eg. milky, resinous, etc.), distinctive odour, dioecy, abundance, pollinators, herbivory, etc.]<br><b>Galls are globular in shape, 10 to 25 mm in diameter. They have a short, basal stalk and numerous rounded projections on the surface. The galls are hard and heavy, usually sinking in water. Bluish- or olive-green in colour. [3]</b> |

|     |                                                                                                                                                                                                                                                                                                                                                                                                                                                                                                                                                                                                                                                                                                                                                                                                                          |
|-----|--------------------------------------------------------------------------------------------------------------------------------------------------------------------------------------------------------------------------------------------------------------------------------------------------------------------------------------------------------------------------------------------------------------------------------------------------------------------------------------------------------------------------------------------------------------------------------------------------------------------------------------------------------------------------------------------------------------------------------------------------------------------------------------------------------------------------|
| 15. | <p>Plant/sample photos (various plant parts, preferably original photos)</p> <div data-bbox="462 283 1226 625"></div> <p>The galls from <i>Q. infectoria</i></p>                                                                                                                                                                                                                                                                                                                                                                                                                                                                                                                                                                       |
| 16. | <p>References</p> <p>[1] <a href="http://www.theplantlist.org/tpl1.1/record/kew-173331">http://www.theplantlist.org/tpl1.1/record/kew-173331</a></p> <p>[2] <a href="http://www.globinmed.com/index.php?option=com_content&amp;view=article&amp;id=105888:quercus-infectoria-g-olivier&amp;catid=286&amp;Itemid=357">http://www.globinmed.com/index.php?option=com_content&amp;view=article&amp;id=105888:quercus-infectoria-g-olivier&amp;catid=286&amp;Itemid=357</a></p> <p>[3] Abdul Haque, A. S.; Ahmad, W.;<br/>ecology of <i>Quercus infectoria</i> Olivier – Galls: A Review. <i>Hippocratic Journal of Unani Medicine</i>, 11(3), 105-118.</p> <p>[4] <a href="https://www.iucnredlist.org/species/194176/56059946#habitat-ecology">https://www.iucnredlist.org/species/194176/56059946#habitat-ecology</a></p> |
